# Supplementary material
Source: publisher figshare collection journal article supplement (https://karger.figshare.com/ndownloader/files/8713759)
Supplement: Supplementary file 1 [file 8713759]

**Supplementary Table - Castellano**

DNA Sequence of *Kiss1* and *Golt1a* transcripts found in rat placenta

**Golt1a Rat Placenta (Ensembl: Rnor_5.0: Chromosome 13)**

| **Exon /**  **Intron** | **Start** | **End** | **Length** | **Sequence** |
| --- | --- | --- | --- | --- |
| Exon 1 | 55,602,891 | 55,602,771 | 121 | actgttgccaaggGTCAGCTTCCTGGGAACATGCCCAGGATCCTCTGGGCTCTCTTCTAG  ACAGCTGACCAGGAAGGCCCCCCAGTGGACTGAAGCATGATCTCCATCACAGAGTGGCAG  A |
| Intron 1-2 | 55,602,770 | 55,592,921 | 9,850 | gtgagtggaatgaatggccggtggt..........ttcaggctctccttacctttggcag |
| Exon 2 | 55,592,920 | 55,592,829 | 92 | AAATTGGCGTGGGCATCACCGGCTTCGGCGTCTTCTTCATCCTCTTTGGGATACTCTTGT  ACTTCGATTCCGTGCTCTTGGCTTTTGGAAAC |
| Intron 2-3 | 55,592,828 | 55,592,060 | 769 | gtgagtcccccgacactaggtacct..........catcctcatttccctgggcctgcag |
| Exon 3 | 55,592,059 | 55,591,881 | 179 | CTGCTGTTCCTGACTGGCCTCTCCCTCATCATCGGCCTGAGGAGAACGTTTTCCTTCTTC  TTCCAACGGCACAAGCTCAAGGGAACAAGCTTCTTCCTGGGCGGTGTCGCCATTGTGCTG  CTGCGCTGGCCCCTGCTAGGCATGCTCTTGGAGGCCTATGGGTTCGTTAGCCTCTTCAA |
| Intron 3-4 | 55,591,880 | 55,591,136 | 745 | gtgagtaccattttcctcagtctca..........cccctgtcctctcttctattcctag |
| Exon 4 | 55,591,135 | 55,591,072 | 64 | GGGGTTTTTCCCTGTAGTCTTTGGCTTCCTGGGCAATGCATTTAACATCCCCTTCCTGAG  CGCA |
| Intron 4-5 | 55,591,071 | 55,590,481 | 591 | gtaagtaggtggggcttgtgcttag..........gaataatgactcttgtttctcacag |
| Exon 5 | 55,590,480 | 55,590,425 | 55 | CTGTTCCAGAGGCTTCAAGGCTCCTCCAGCTCAATGGTCTGAACTGCCCACCCCG |
| Intron 5-6 | 55,590,424 | 55,582,750 | 7674 | gtgagctccttgaattcggattgtt..........ctcactcctctgtactctgtcctag |
| Exon 6 | 55,582,749 | 55,582,203 | 546 | GCCAACAGTCCGGACCCCAGGAACTCGTTAATGCCTGGCAAAAGGGCCCGCGGTATGCAG  AGAGCAAGCCTGGGGCTGCAGGACTGCGCGCTCGCCGAACATCGCCATGCCCGCCGGTGG  AGAACCCCACGGGGCACCAGCGGCCCCCGTGTGCCACCCGCAGTCGCCTGATCCCTGCGC  CCCGCGGATCGGTGCTGGTGCAGCGCGAGAAGGACATGTCAGCCTACAACTGGAACTCCT  TTGGCCTGCGCTACGGCAGGAGGCAGGTGGCGCGGGCGGCACGGGGCTGAgtgcagggtt  gcaggtggattgcagcccaccccatggcagaggccaaggcagggagcttctagacttgtg  caataaaagcaatgctgtcgccttaccgtgtgtgatttttccccggaatctgcgggcagt  gcagagagggcagatcctcttctcccttagttgcctcttctctgatttcaagatgtctct  ggtgccaaaatcggtactttttaaattactagttaaggaaggacccggctgttgccccgg  ctattg |
|  |  |  |  |  |

**Kiss1 Rat Placenta (Ensembl: Rnor_5.0: Chromosome 13)**

| **Exon /**  **Intron** | **Start** | **End** | **Length** | **Sequence** |
| --- | --- | --- | --- | --- |
| Exon 1 | 55,585,008 | 55,584,860 | 149 | TcttcgtctcagcctctggacaccctgtggatctgcctcttccagaATGATCTCGCTGGC TTCTTGGCAGCTGCTGCTTCTCCTCTGTGTGGCCTCTTTTGGGGAGCCACTGGCAAAAAT  GGCACCTGTGGTGAACCCTGAACCCACAG |
| Intron 1-2 | 55,584,859 | 55,582,750 | 2,110 | gtacacaccatcccggaaaaggggg..........ctcactcctctgtactctgtcctag |
| Exon 2 | 55,582,749 | 55,582,203 | 546 | GCCAACAGTCCGGACCCCAGGAACTCGTTAATGCCTGGCAAAAGGGCCCGCGGTATGCAG  AGAGCAAGCCTGGGGCTGCAGGACTGCGCGCTCGCCGAACATCGCCATGCCCGCCGGTGG  AGAACCCCACGGGGCACCAGCGGCCCCCGTGTGCCACCCGCAGTCGCCTGATCCCTGCGC  CCCGCGGATCGGTGCTGGTGCAGCGCGAGAAGGACATGTCAGCCTACAACTGGAACTCCT  TTGGCCTGCGCTACGGCAGGAGGCAGGTGGCGCGGGCGGCACGGGGCTGAgtgcagggtt  gcaggtggattgcagcccaccccatggcagaggccaaggcagggagcttctagacttgtg  caataaaagcaatgctgtcgccttaccgtgtgtgatttttccccggaatctgcgggcagt  gcagagagggcagatcctcttctcccttagttgcctcttctctgatttcaagatgtctct  ggtgccaaaatcggtactttttaaattactagttaaggaaggacccggctgttgccccgg  ctattg |
|  |  |  |  |  |

Relative positions of the transcripts are referred to Ensebl: Rnor_5.0: Chromosome 13. In purple are untranslated regions, in blue the introns and in black the coding regions.
